# Supplementary material
Source: PubMed Central journal article supplement (PMC11373993)
Supplement: PBI-22-347-s003.pdf [file PBI-22-347-s003.pdf]

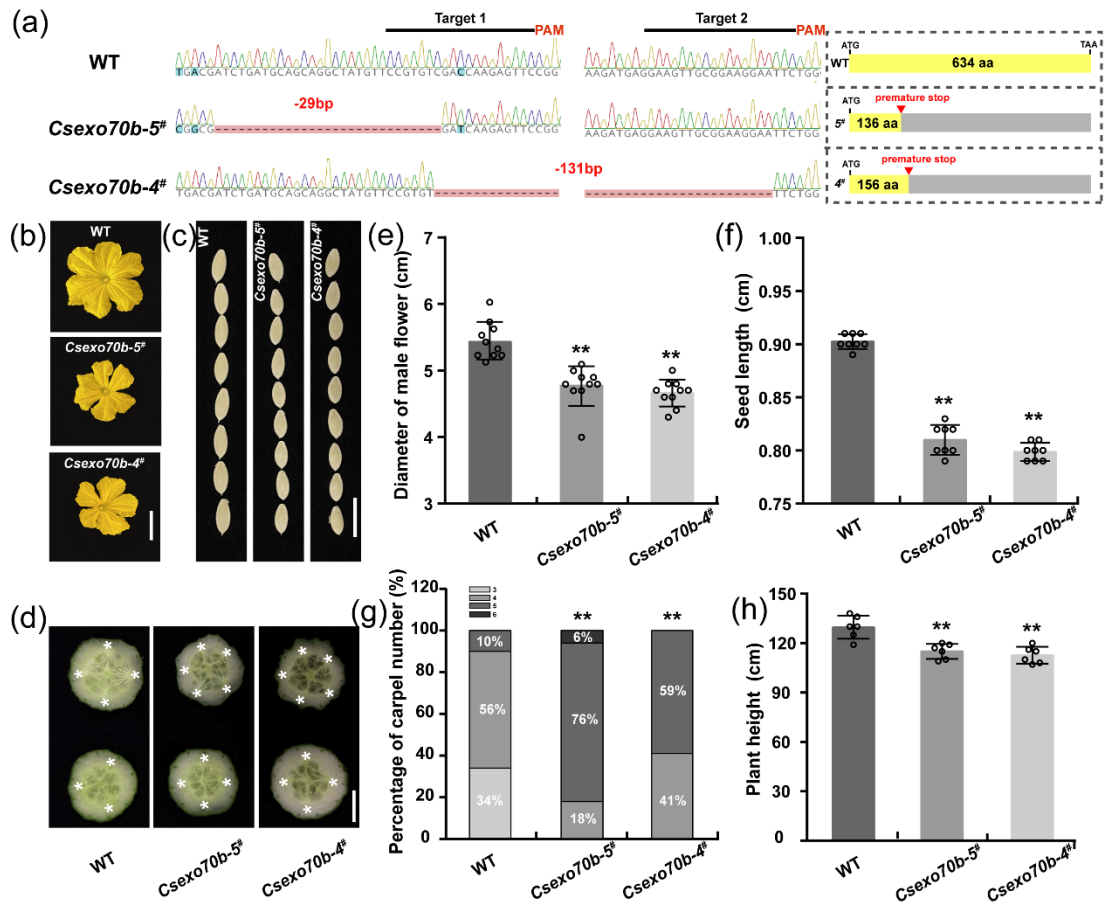

**Figure S1** Genotyping and phenotypic analysis of *Csexo70b* mutants. (a) Sequencing analysis of target sites in *Csexo70b* mutants, *Csexo70b-5<sup>#</sup>* and *Csexo70b-4<sup>#</sup>* mutants led to truncated proteins with 136 amino acid (aa) and 156 aa, respectively. (b) Morphology of male flowers in *Csexo70b* mutants at anthesis. Scale bar = 2 cm. (c) Morphology of cucumber seeds of WT and *Csexo70b* mutants. Scale bar = 1 cm. (d) Cross-sections indicated WT and *Csexo70b* mutants exhibited different carpel numbers. Scale bar = 2 cm. (e-h), Quantification analysis of diameter of male flower (e), seed length (f), carpel numbers (g), and plant height (h) of WT and *Csexo70b* mutants. Data are shown as means  $\pm$  SD,  $n \geq 6$ . Statistical significances were indicated by asterisks (\*\*,  $P < 0.01$ , one-way ANOVA with Tukey's test).

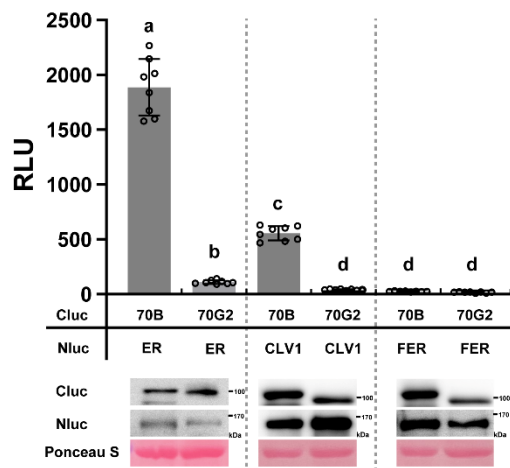

**Figure S2** CsExo70B interacts with CsERECTA and CsCLV1 in *Nicotiana benthamiana* (*N. benthamiana*) plants. The indicated constructs were expressed in *N. benthamiana* leaves, and luciferase activity was recorded by a luminometer. Values are means  $\pm$  SD ( $n = 8$ ). The different lowercase letters indicate significant differences ( $P < 0.01$ ) by one-way ANOVA analysis with Tukey's test. These indicated fusion proteins were detected by anti-Cluc and anti-HA antibodies, respectively. 70B, CsExo70B; 70G2, CsExo70G2; ER, CsERECTA; FER, CsFERONIA.

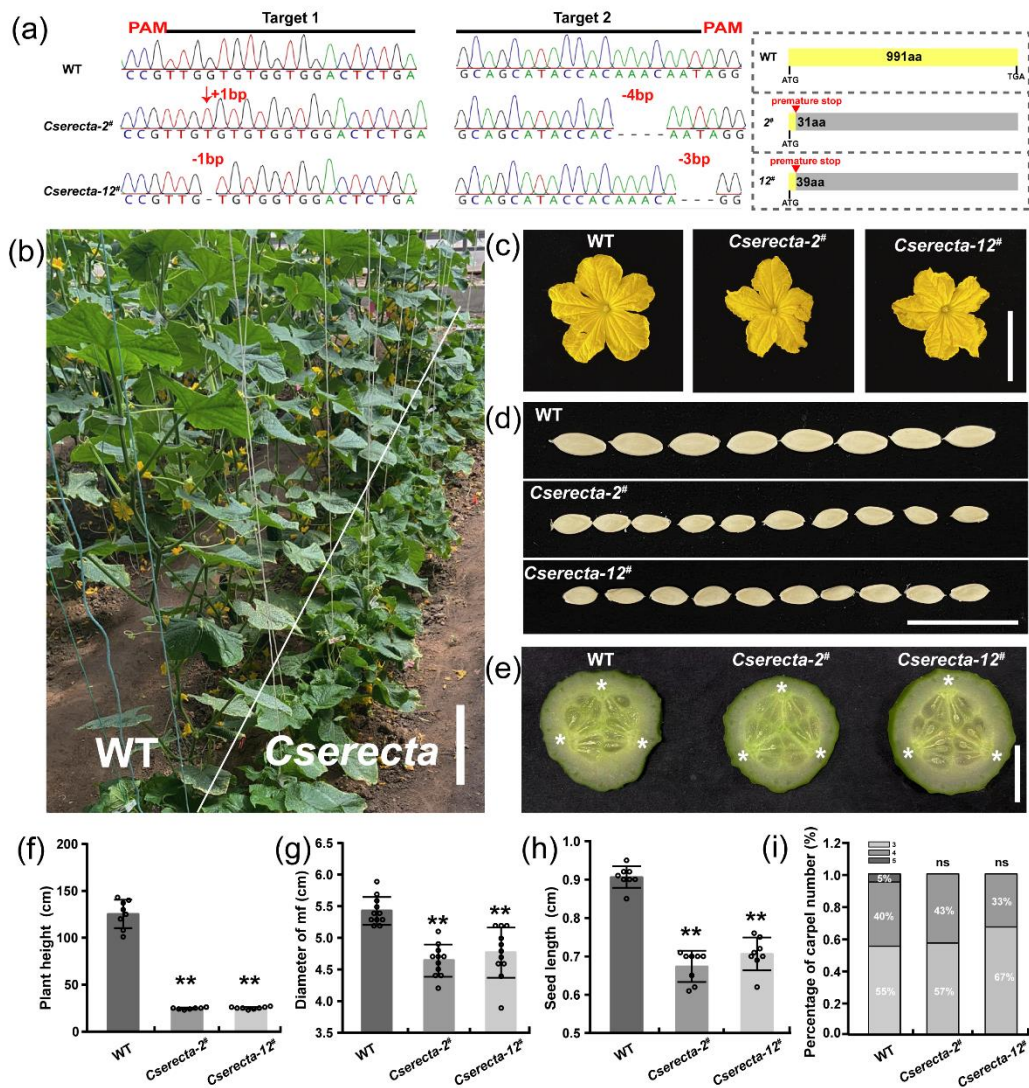

**Figure S3** Knockout of *CsERECTA* resulted in dwarfed plants, smaller male flowers and seeds in cucumber. (a) Sequencing analysis of target sites in *Cserecta* mutants, both *Cserecta-2<sup>#</sup>* and *Cserecta-12<sup>#</sup>* mutants lead to truncated proteins with 31 aa and 39 aa in length, respectively. (b-e) Phenotypes of whole plant (b), male flower (c), seed length (d) and carpel number (e) in *Cserecta* mutants, scale bar = 20 cm (b) or 2 cm (c-e). (f-i) Quantification of plant height (f), diameter of male flower (g), seed length (h) and carpel numbers (i) in WT and *Cserecta* mutants, data are shown as means  $\pm$  SD ( $n \geq 8$ ), statistical significances were determined by one-way ANOVA (\*\*,  $P < 0.01$ ; ns, no significant difference).

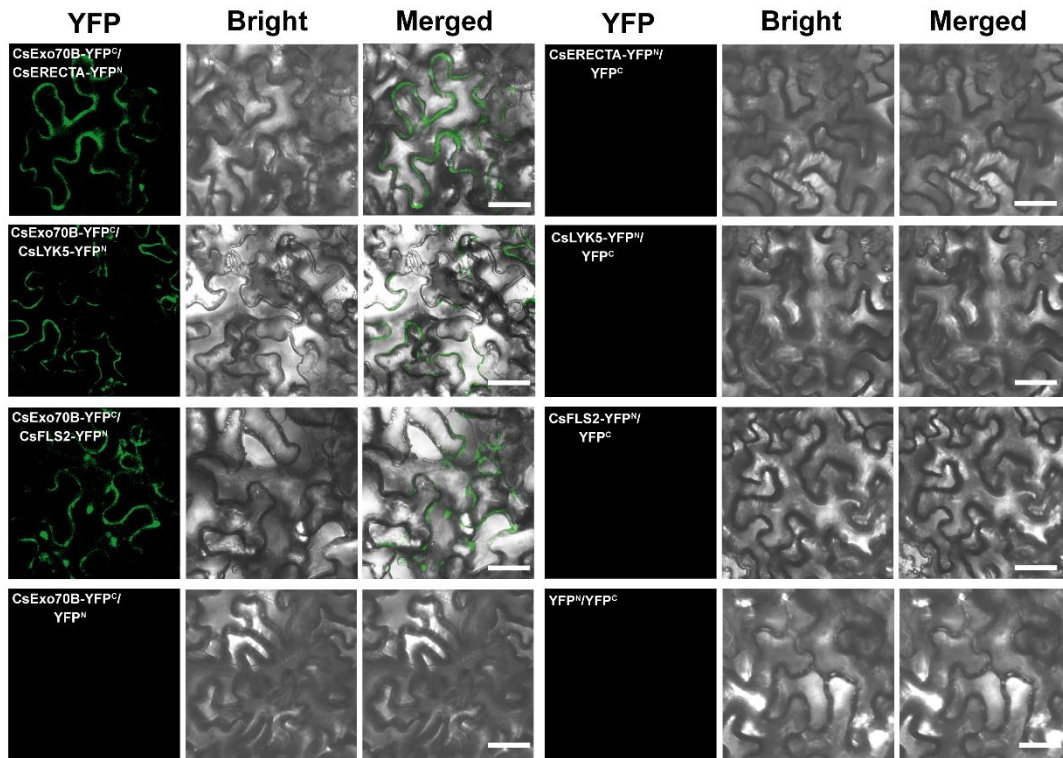

**Figure S4** The bimolecular fluorescence complementation (BiFC) assays showing CsExo70B interacts with CsERECTA, CsFLS2 and CsLYK5. Agrobacteria containing the indicated constructs were infiltrated into *N. benthamiana* leaves, and YFP signals were captured by confocal microscopy after 72h post-infiltration, scale bar = 20  $\mu$ m.

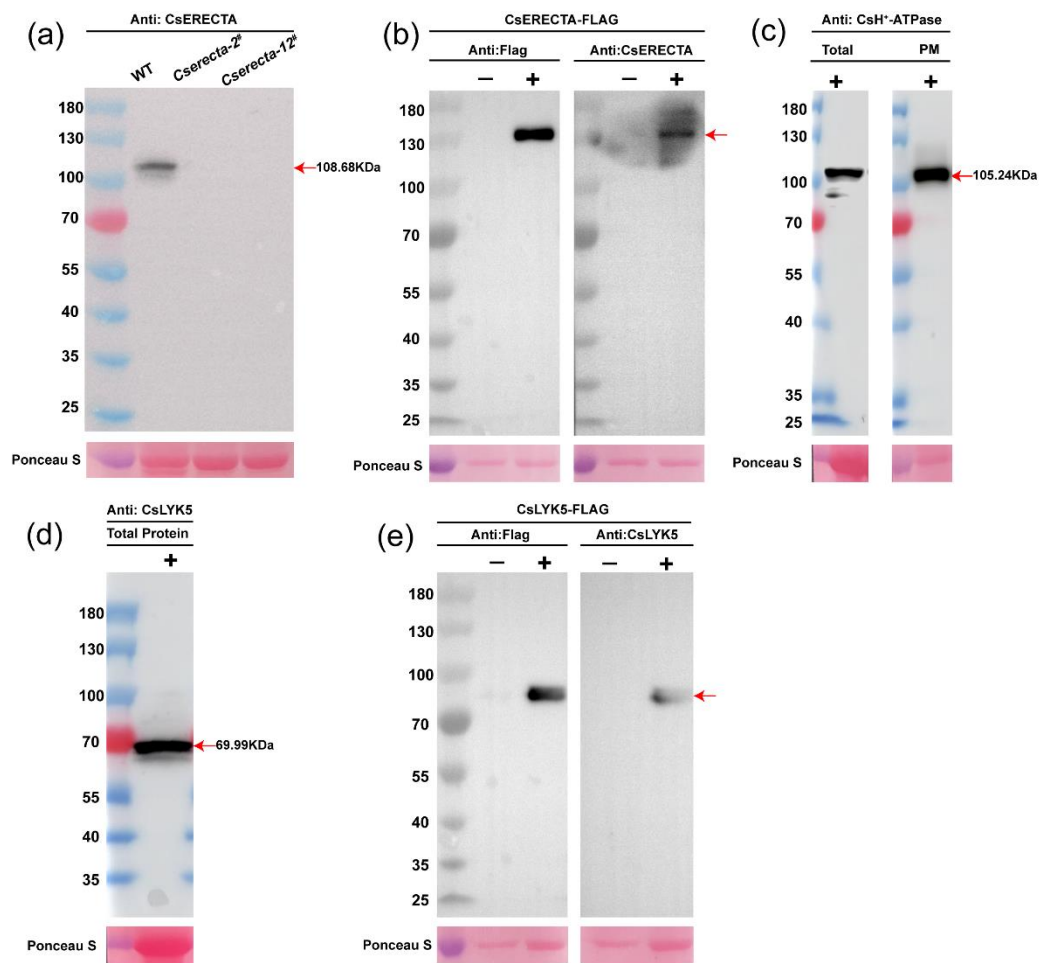

**Figure S5** Detection the specificity of CsERECTA, CsLYK5, and CsH<sup>+</sup>-ATPase antibodies. (a) Total proteins were extracted from cucumber plants, and subjected to immunoblotting using anti-CsERECTA antibody. *Cserecta* mutants were used as the negative control. The predicted molecular weight of CsERECTA protein was 108.68kDa. (b) Total protein were extracted from *N. benthamiana* leaves expressing CsERECTA-FALG, and detected using anti-FALG and anti-CsERECTA antibodies, respectively. (c) Detection of CsH<sup>+</sup>-ATPase antibody in cucumber total and plasma membrane (PM) proteins, the predicted molecular weight of CsH<sup>+</sup>-ATPase was 105.24kDa. (d) Detection of CsLYK5 antibody in cucumber total protein, the predicted molecular weight of CsLYK5 protein was 69.99kDa. (e) Total protein were extracted from *N. benthamiana* leaves expressing CsLYK5-FALG, and detected by anti-FALG and anti-CsLYK5 antibodies, respectively.



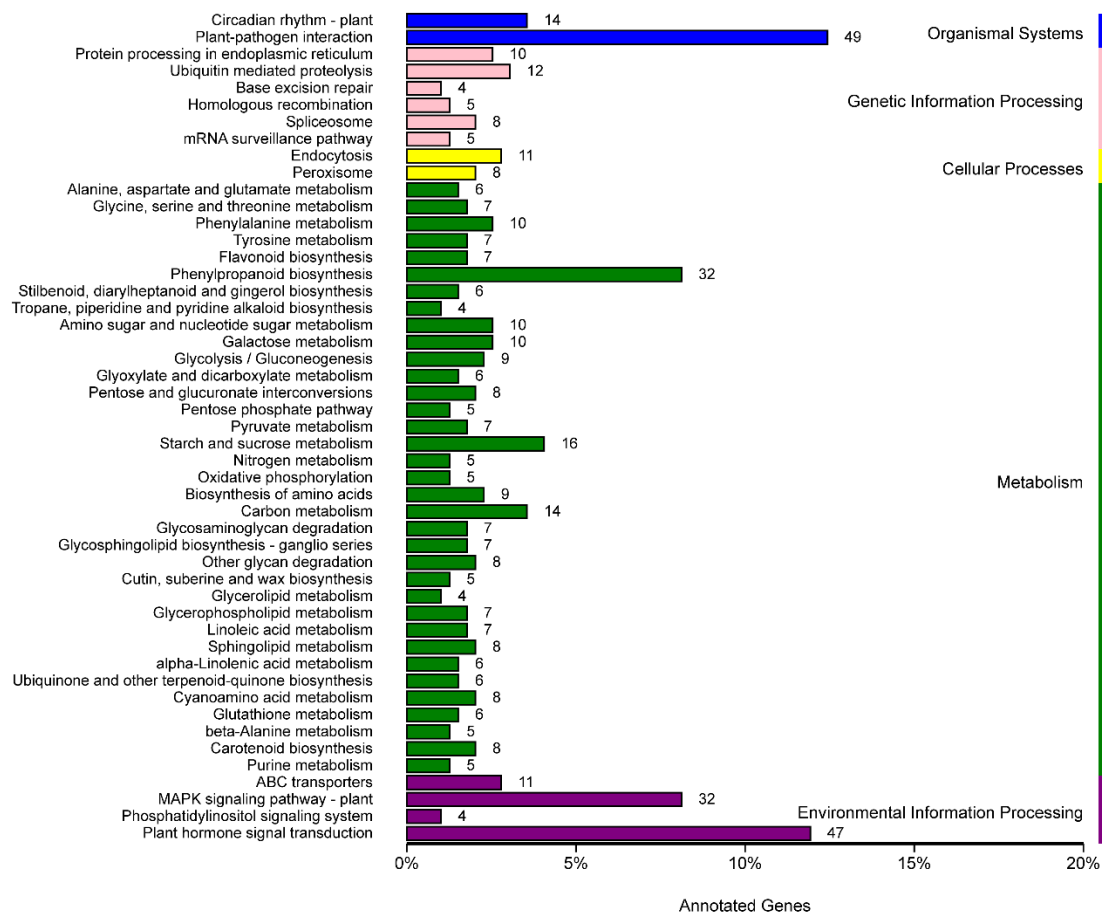

**Figure S6** KEGG enrichment analyses of common up-regulated DEGs in *Csexo70b-5#* and *Cserecta-2#* mutants.

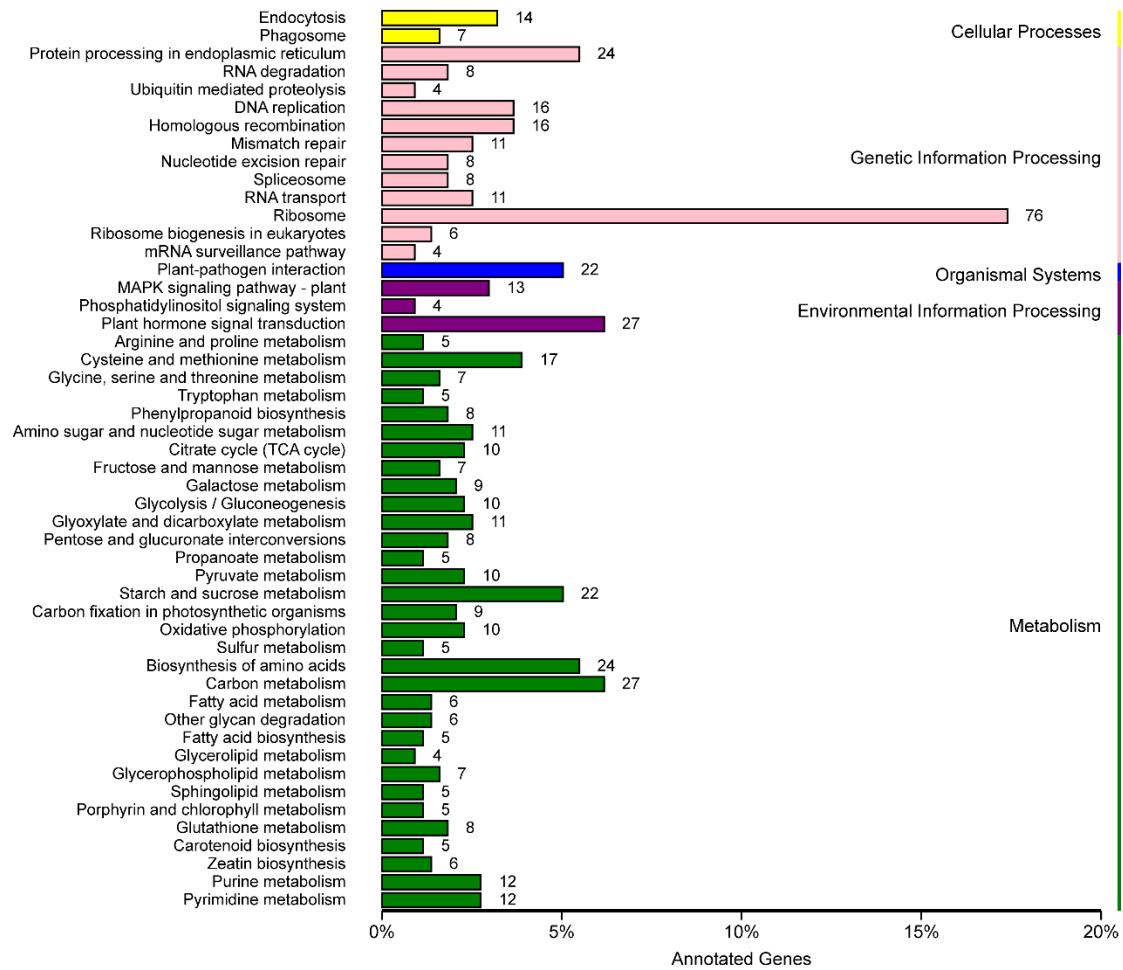

**Figure S7** KEGG enrichment analyses of common down-regulated DEGs in *Csexo70b-5#* and *Cserecta-2#* mutants.

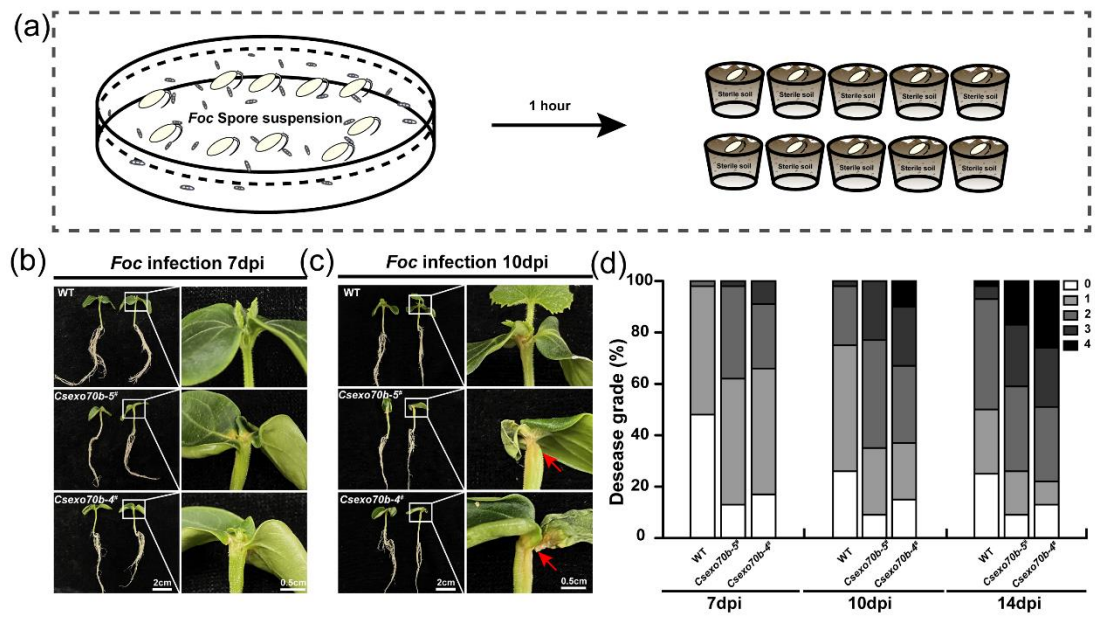

**Figure S8** Knockout of *CsExo70B* promotes *Fusarium oxysporum* f. sp. *Cucumerinum* Owen (*Foc*) infection in cucumber. (a) The schematic diagram of radicle dipping infection method. The cucumber seedlings with 1cm radicles were inoculated in *Foc* spore suspension for 1 hour, and then planted in sterilized soil. Disease index (DI) was measured at indicated time points. (b and c) The morphology of *Csexo70b* mutants and WT at 7dpi (b) and 10 dpi (c). Red arrows mean wilted stems and leaves. (d) The disease grade was counted from 30 plantlets in WT and *Csexo70b* mutants, respectively.



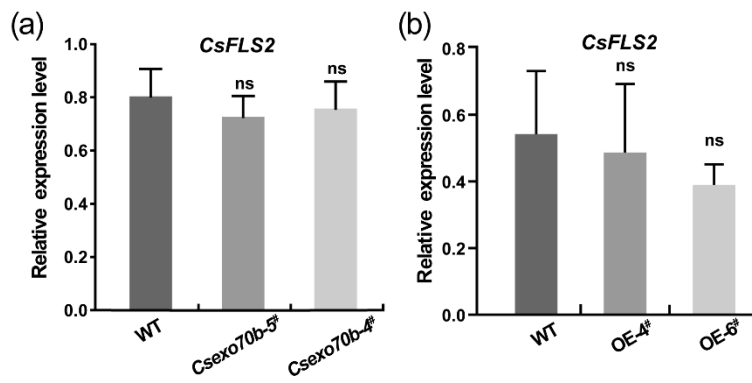

**Figure S9** The expression level of *CsFLS2* was normal in *Csexo70b* mutants and *CsExo70B*-OE lines. (a and b) Transcript analysis of *CsFLS2* in *Csexo70b* mutants (a) and *CsExo70B*-OE lines (b). Data are means  $\pm$  SD,  $n = 3$  (ns, no significant difference, one-way ANOVA analysis with Tukey's test).

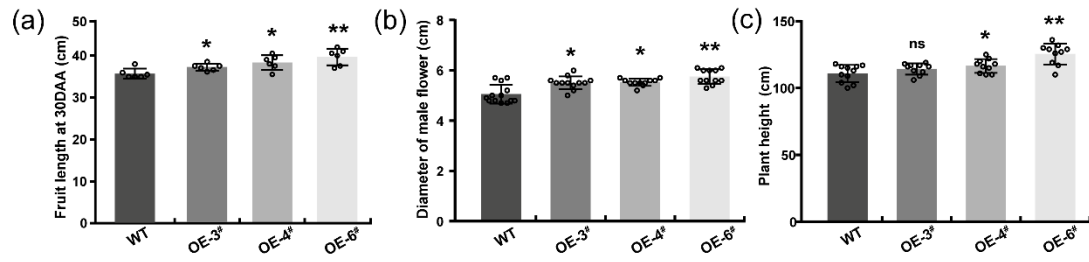

**Figure S10** Phenotypic analysis of *CsExo70B* overexpression lines. (a) Quantification of fruit length at 30 DAA,  $n = 6$ . (b and c) Quantification of diameter of male flower (c), and plant height (d) in WT and *CsExo70B* overexpression lines,  $n \geq 10$ . Data are shown as means  $\pm$  SD (\*,  $P < 0.05$ ; \*\*,  $P < 0.01$ ; one-way ANOVA with Tukey's test).

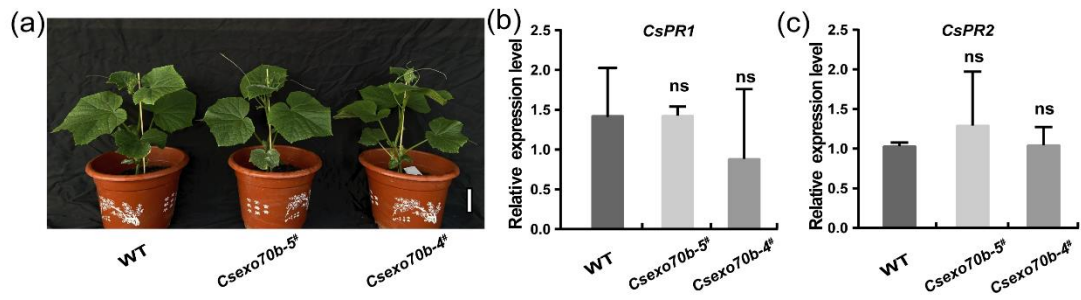

**Figure S11** The phenotypes of *Csexo70b* mutants. (a) No cell death was observed in the *Csexo70b* mutants. Scale bar = 5cm. (b and c) The expression levels of *CsPR1* (b) and *CsPR2* (c) were normal in *Csexo70b* mutants. Data are means  $\pm$  SD,  $n \geq 2$  (ns, no significant difference, one-way ANOVA).

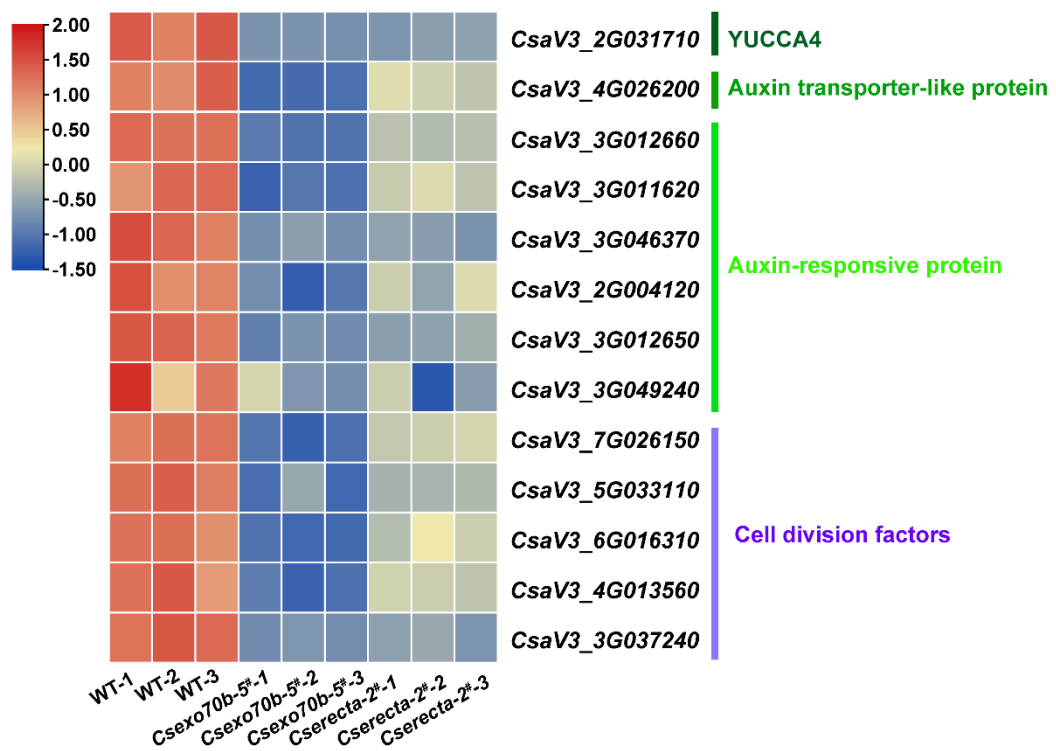

**Figure S12** Heat map showing the expression pattern of genes involved in auxin-related and cell division-related pathway. Three biological replicates were performed and the colored bar on the left represents fold change (log2 value).

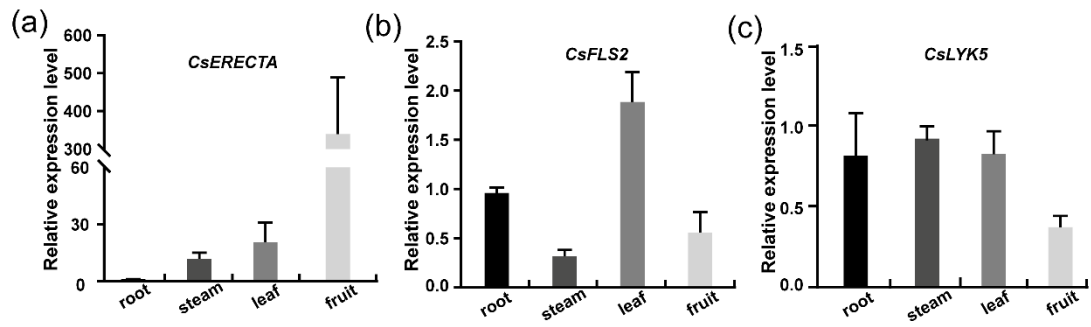

**Figure S13** Expression patterns of *CsERECTA*, *CsFLS2*, and *CsLYK5* in cucumber different tissues. Data represent means  $\pm$  SD, n = 3.

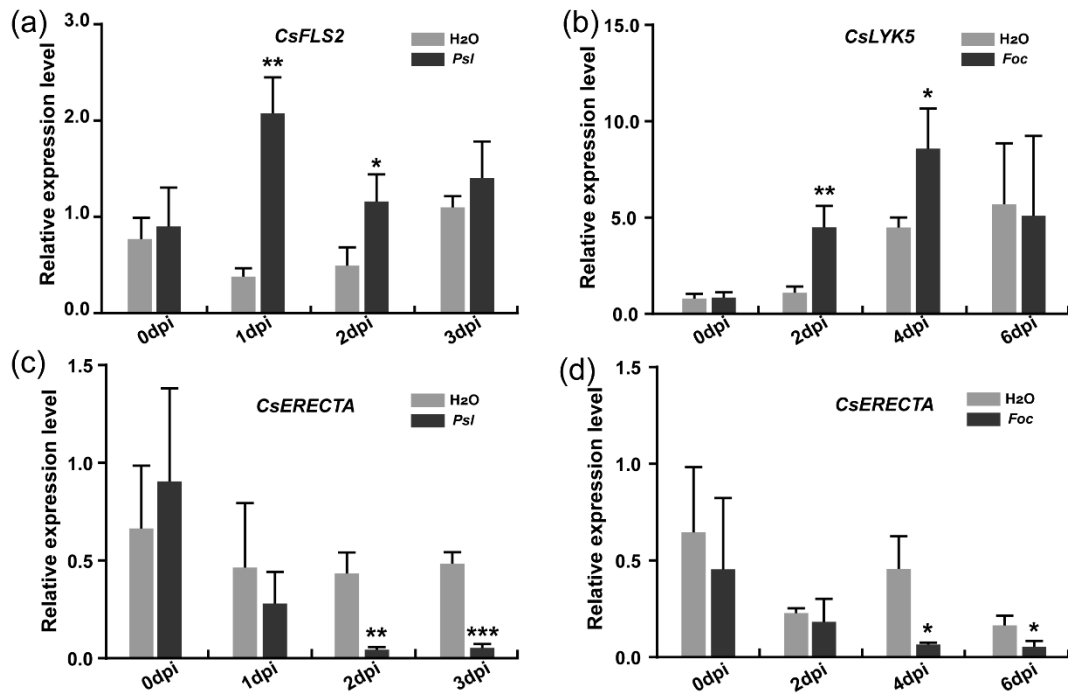

**Figure S14** Pathogen-induced *RK* expression in cucumber. (a) *Psi*-induced *CsFLS2* expression. (b) *Foc*-induced *CsLYK5* expression. (c and d) The expression of *CsERECTA* was significantly down-regulated by *Psi* (c), and *Foc* (d) infection. The cucumber leaves were infected by *Psi*, and roots were inoculated by *Foc*, H<sub>2</sub>O treatment as control. qRT-PCR data are means  $\pm$  SD, n = 3. (\*,  $P < 0.05$ ; \*\*,  $P < 0.01$ ; \*\*\*,  $P < 0.001$ , Student's *t* test).



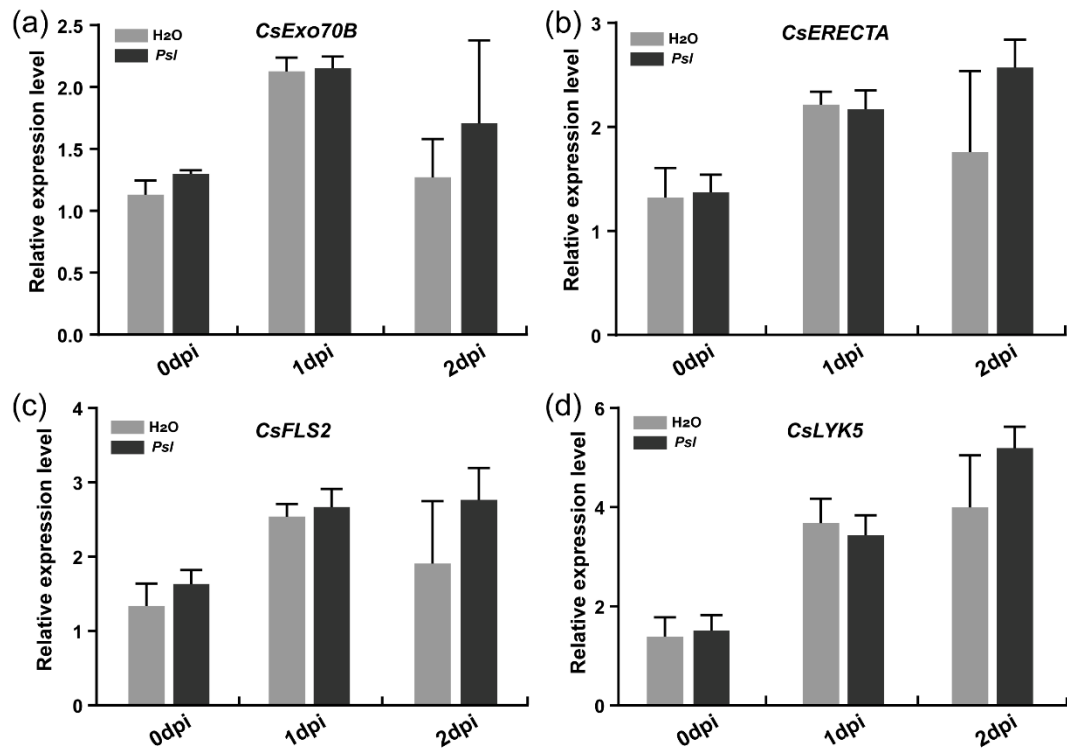

**Figure S15** The expression of *CsExo70B* and *RKs* were normal in fruits infected by pathogen. The transcripts of *CsExo70B* (a), *CsERECTA* (b), *CsFLS2* (c), and *CsLYK5* (d) were analyzed in ovaries at anthesis after 0, 1, and 2dpi with *PsI* infection. Data are means  $\pm$  SD, n = 3.

**Table S1. List of off-target analyses of CsExo70B and CsERECTA**

| Genes           | Potential off-target sites |                                 |        |                      | Examined plants                 | Presence of mutation |
|-----------------|----------------------------|---------------------------------|--------|----------------------|---------------------------------|----------------------|
|                 | Off-target                 | Sequence                        | Region | Number of mismatches |                                 |                      |
| <i>CsExo70B</i> | 1                          | CTGTG <b>ACGACGAAGAGTTCCGG</b>  | CDS    | 3                    | 5 <sup>#</sup> &4 <sup>#</sup>  | none                 |
| <i>CsExo70B</i> | 1                          | CAGTGT <b>CCAAGAAGAGTTCTGG</b>  | CDS    | 4                    | 5 <sup>#</sup> &4 <sup>#</sup>  | none                 |
| <i>CsExo70B</i> | 1                          | CGCTGT <b>CGACGAAGGTTCTGG</b>   | CDS    | 4                    | 5 <sup>#</sup> &4 <sup>#</sup>  | none                 |
| <i>CsExo70B</i> | 2                          | GATGGG <b>GCGGAGGGAATTCCGG</b>  | CDS    | 4                    | 5 <sup>#</sup> &4 <sup>#</sup>  | none                 |
| <i>CsExo70B</i> | 2                          | GTAGT <b>GCGGAGGCAATTCCGG</b>   | CDS    | 4                    | 5 <sup>#</sup> &4 <sup>#</sup>  | none                 |
| <i>CsExo70B</i> | 2                          | GAAGTT <b>GATGAAGCGATTCCGGG</b> | CDS    | 4                    | 5 <sup>#</sup> &4 <sup>#</sup>  | none                 |
| <i>CsExo70B</i> | 2                          | GAAGT <b>AGCCGAAGAAATTGAGG</b>  | CDS    | 4                    | 5 <sup>#</sup> &4 <sup>#</sup>  | none                 |
| <i>CsERECTA</i> | 1                          | TGAG <b>CGTCGACCACCAACAG</b>    | CDS    | 3                    | 2 <sup>#</sup> &12 <sup>#</sup> | none                 |
| <i>CsERECTA</i> | 1                          | G <b>CAGAGTTCATCACTCCAAAGG</b>  | CDS    | 3                    | 2 <sup>#</sup> &12 <sup>#</sup> | none                 |
| <i>CsERECTA</i> | 1                          | TCA <b>AAATTCAGCACACCAACAG</b>  | CDS    | 4                    | 2 <sup>#</sup> &12 <sup>#</sup> | none                 |
| <i>CsERECTA</i> | 2                          | <b>TTAGAATATCACAACAATAGG</b>    | intron | 4                    | 2 <sup>#</sup> &12 <sup>#</sup> | none                 |
| <i>CsERECTA</i> | 2                          | <b>CCAGCAAACCACAAAAAACGG</b>    | intron | 4                    | 2 <sup>#</sup> &12 <sup>#</sup> | none                 |
| <i>CsERECTA</i> | 2                          | <b>TCAGCAGACCAAAACCAATGGG</b>   | CDS    | 4                    | 2 <sup>#</sup> &12 <sup>#</sup> | none                 |
| <i>CsERECTA</i> | 2                          | <b>TCAGCATCCCACAATAATTGG</b>    | intron | 4                    | 2 <sup>#</sup> &12 <sup>#</sup> | none                 |

Note: Bold represents PAM sequences; Red represents mismatch.

**Table S4. List of primers used in this study**

| <b>Primers for cucumber transformation</b>                                          |                                                                    |
|-------------------------------------------------------------------------------------|--------------------------------------------------------------------|
| <i>CsExo70B-DT1-BSF</i>                                                             | 5'- ATATATGGTCTCGATTGCCGTGTCGACCAAGAGTTCGTT -3'                    |
| <i>CsExo70B-DT1-F0</i>                                                              | 5'- TGCCGTGTCGACCAAGAGTTTCGTTTTAGAGCTAGAAAATAGC -3'                |
| <i>CsExo70B-DT1-BSR</i>                                                             | 5'- AACGAATTCCTTCCGCAACTTCCAATCTCTTAGTCGACTCTAC -3'                |
| <i>CsExo70B-DT1-R0</i>                                                              | 5'- ATTATTGGTCTCGAAACGAATTCCTTCCGCAACTTCCAA -3'                    |
| <i>CsERECTA-DT1-BSF</i>                                                             | 5'- ATATATGGTCTCGATTGTCAGAGTCCACCACACCAAGTT -3'                    |
| <i>CsERECTA -DT1-F0</i>                                                             | 5'- TGTCAGAGTCCACCACACCAAGTTTTAGAGCTAGAAAATAGC-3'                  |
| <i>CsERECTA -DT1-BSR</i>                                                            | 5'-ATTATTGGTCTCGAAACATTGTTTGTGGTATGCTGCCAA-3'                      |
| <i>CsERECTA -DT1-R0</i>                                                             | 5'-AACATTGTTTGTGGTATGCTGCCAATCTCTTAGTCGACTCTAC-3'                  |
| <i>CsExo70B-PUC19-HA-F (KpnI)</i>                                                   | 5'-cgggggacgagctc <b>ggtacc</b> ATGGTTGACAATGGCGAAGAAAAGT-3'       |
| <i>CsExo70B-PUC19-HA-R (Sall)</i>                                                   | 5'-acatcgatggta <b>gtcgac</b> TCAAGCGTAATCTGGAACGTC-3'             |
| <i>CsExo70B-HA-1305.4-F (SmaI)</i>                                                  | 5'-cgggggactctagaggatc <b>cccggg</b> ATGGTTGACAATGGCGAAGAAAAGT-3'  |
| <i>CsExo70B-HA-1305.4-R (BstEI)</i>                                                 | 5'-gaacgatcggggaaattcgagct <b>ggtcacc</b> TCAAGCGTAATCTGGAACGTC-3' |
| <b>Primers for qRT-PCR</b>                                                          |                                                                    |
| <i>CsExo70B-Q-F</i>                                                                 | 5'-TCCGGGACTATCAACGATCT-3'                                         |
| <i>CsExo70B-Q-R</i>                                                                 | 5'-TCCCTCCTGCAGCTACTATAA-3'                                        |
| <i>CsERECTA-Q-F</i>                                                                 | 5'-GACGAGATTGGTGACTGTTCTT-3'                                       |
| <i>CsERECTA-Q-R</i>                                                                 | 5'-CATTTCAGCTGCTTCAACTTC-3'                                        |
| <i>CsLYK5-Q-F</i>                                                                   | 5'-CAATCAACTGACCGGACTCTAC-3'                                       |
| <i>CsLYK5-Q-R</i>                                                                   | 5'-GGAAGGAACGGAATCGTAAGG-3'                                        |
| <i>CsFLS2-Q-F</i>                                                                   | 5'-CTGCAATTGGTCTGGCATTATC-3'                                       |
| <i>CsFLS2-Q-R</i>                                                                   | 5'-GAGCTGAGAGGTTCCCAATAAA-3'                                       |
| <i>CsPR1-Q-F</i>                                                                    | 5'-TCACCTCCTATCGCTCAA-3'                                           |
| <i>CsPR1-Q-R</i>                                                                    | 5'-AGTTCGCTACAGTTTCATCCC-3'                                        |
| <i>CsPR2-Q-F</i>                                                                    | 5'-CCTTATGCCTTCTTGGTCTTCT-3'                                       |
| <i>CsPR2-Q-R</i>                                                                    | 5'-AGAGAGTCACCACTTCTGTTTG-3'                                       |
| <b>Primers for off-target sites analysis of <i>CsExo70B</i> and <i>CsERECTA</i></b> |                                                                    |
| <i>CsExo70B-T1-off1-F</i>                                                           | 5'-ATGCGAGTCACGGTATCAG-3'                                          |
| <i>CsExo70B-T1-off1-R</i>                                                           | 5'-CGTCCGGATCGGGCACC-3'                                            |
| <i>CsExo70B-T1-off2-F</i>                                                           | 5'-CACTCTTAGAGGGAAGCTG-3'                                          |
| <i>CsExo70B-T1-off2-R</i>                                                           | 5'-CGGCATTGAGTACTAGTGTC-3'                                         |
| <i>CsExo70B-T1-off3-F</i>                                                           | 5'-ATGGCCTACGATTACGGATC-3'                                         |
| <i>CsExo70B-T1-off3-R</i>                                                           | 5'-CAACAACATTCTTTCCTGGTTC-3'                                       |
| <i>CsExo70B-T2-off1-F</i>                                                           | 5'-GAGATATTATCTTTAACGGGATC-3'                                      |
| <i>CsExo70B-T2-off1-R</i>                                                           | 5'-TCAATAAGATGCTCTCCC-3'                                           |
| <i>CsExo70B-T2-off2-F</i>                                                           | 5'-ATGCCTCAATCTTCTTTCAA-3'                                         |
| <i>CsExo70B-T2-off2-R</i>                                                           | 5'-CACTACCACTACCACTACCACC-3'                                       |
| <i>CsExo70B-T2-off3-F</i>                                                           | 5'-GAAACTTATGCAATGCTG-3'                                           |
| <i>CsExo70B-T2-off3-R</i>                                                           | 5'-CTAATCTCTACCAACAG-3'                                            |
| <i>CsExo70B-T2-off4-F</i>                                                           | 5'-GGGCATCCCGTACATGTTCCGGTT-3'                                     |
| <i>CsExo70B-T2-off4-R</i>                                                           | 5'-AGTATACCGATCACCCTCCCG-3'                                        |
| <i>CsERECTA-T1-off1-F</i>                                                           | 5'-TTTGAAGATGTTGCTGATAGTAAGG-3'                                    |

---

|                           |                                 |
|---------------------------|---------------------------------|
| <i>CsERECTA-T1-off1-R</i> | 5'-ATTGTTGCATTACTGGCTAAGATAC-3' |
| <i>CsERECTA-T1-off2-F</i> | 5'-TGGTTGGAGATAAAGAGCATCC-3'    |
| <i>CsERECTA-T1-off2-R</i> | 5'-GCTGCATGTAACCCCTTCTAGT-3'    |
| <i>CsERECTA-T1-off3-F</i> | 5'-ACTGATCCAGCGACTATTCTAAC-3'   |
| <i>CsERECTA-T1-off3-R</i> | 5'-ACGGGAGAAGAGATAGGAAATTG-3'   |
| <i>CsERECTA-T2-off1-F</i> | 5'-TCCATTGGGATCTCCAGGGA-3'      |
| <i>CsERECTA-T2-off1-R</i> | 5'-CATGCATTGTAATCTAAGA-3'       |
| <i>CsERECTA-T2-off2-F</i> | 5'-CTACGAGTTACCTTGACACCTAAA-3'  |
| <i>CsERECTA-T2-off2-R</i> | 5'-ACGCATCTCAGTTACCTTATCC-3'    |
| <i>CsERECTA-T2-off3-F</i> | 5'-CTCATGTAGAGTTTGGGAAGGAG-3'   |
| <i>CsERECTA-T2-off3-R</i> | 5'-GGAGGCTAAACATGGCAAATG-3'     |
| <i>CsERECTA-T2-off4-F</i> | 5'-ACTAGTGGCTCCATAGCTGAA-3'     |
| <i>CsERECTA-T2-off4-R</i> | 5'-CCGTTGCACACGTCGATTA-3'       |

---

**Primers for BiFC, Split-LUC and Co-IP**

---

|                                     |                                                         |
|-------------------------------------|---------------------------------------------------------|
| <i>CsExo70B-CE-F (BamHI)</i>        | 5'-cgcgccactagtgatccATGGTTGACAATGGCGAAGAA-3'            |
| <i>CsExo70B-CE-R (BamHI)</i>        | 5'-agtactatcgatgatccCCTCCTTCCACTGCCTGA-3'               |
| <i>CsERECTA-NE-F (BamHI)</i>        | 5'-cgcgccactagtgatccATGAAGTCTGTGAAGAGGGCAG-3'           |
| <i>CsERECTA-NE-R (BamHI)</i>        | 5'-agtactatcgatgatccCTCACTGTTTTGTGATATTACC-3'           |
| <i>CsFLS2-NE-F (BamHI)</i>          | 5'-cgcgccactagtgatccATGGCTTCTTACGTTAGTTTAGC-3'          |
| <i>CsFLS2-NE-R (BamHI)</i>          | 5'-agtactatcgatgatccCAATTCATCCCTCTGCAGCT-3'             |
| <i>CsLYK5-NE-F (BamHI)</i>          | 5'-cgcgccactagtgatccATGAAAATAATTTCAACTTTTTATTCTCT-3'    |
| <i>CsLYK5-NE-R (BamHI)</i>          | 5'-agtactatcgatgatccTAATTCACATTTGTCTCTGCC-3'            |
| <i>Cluc-CsExo70B-F (KpnI)</i>       | 5'-gtccccgggctgaccATGGTTGACAATGGCGAAGAA-3'              |
| <i>Cluc-CsExo70B-R (Sall)</i>       | 5'-gaaagctctgcaggtcgacTTACCTCCTTCCACTGCCTGA-3'          |
| <i>CsExo70G2-Cluc-F (KpnI)</i>      | 5'-acgggggacgagctcggtaccATGGACGAGATGGAAGCCACT -3'       |
| <i>CsExo70G2-Cluc-R (Sall)</i>      | 5'-cgcgtagcagatctggtcgacCGAAGCAGTAATGGACGCG-3'          |
| <i>CsERECTA-Nluc-F (KpnI)</i>       | 5'-cgggggacgagctcggtaccATGAAGTCTGTGAAGAGGGCAG-3'        |
| <i>CsERECTA-Nluc-R (Sall)</i>       | 5'-acatcgatgggtagtcgacCTCACTGTTTTGTGATATTACC-3'         |
| <i>CsFLS2-Nluc-F (KpnI)</i>         | 5'-cgggggacgagctcggtaccATGGCTTCTTACGTTAGTTTAGC-3'       |
| <i>CsFLS2-Nluc-R (Sall)</i>         | 5'-acatcgatgggtagtcgacCAATTCATCCCTCTGCAGCT-3'           |
| <i>CsLYK5-Nluc-F (KpnI)</i>         | 5'-cgggggacgagctcggtaccATGAAAATAATTTCAACTTTTTATTCTCT-3' |
| <i>CsLYK5-Nluc-R (Sall)</i>         | 5'-acatcgatgggtagtcgacTAATTCACATTTGTCTCTGCC-3'          |
| <i>CsBAK1-Nluc-F (KpnI)</i>         | 5'-cgggggacgagctcggtaccATGTCGGTGATGTTTCAGTTCTTCG-3'     |
| <i>CsBAK1-Nluc-R (Sall)</i>         | 5'-acatcgatgggtagtcgacTCTTGGACCAGACAATTCATCAGG-3'       |
| <i>CsFER-Nluc-F (KpnI)</i>          | 5'-cgggggacgagctcggtaccATGAAGGAAATTCGTGGTCTTG-3'        |
| <i>CsFER-Nluc-R (Sall)</i>          | 5'-acatcgatgggtagtcgacACGTCTTTTTGGTTTCATGATC-3'         |
| <i>CsCLV1-Nluc-F (KpnI)</i>         | 5'-cgggggacgagctcggtaccATGAAGAGAAGACCGATTGATCCT-3'      |
| <i>CsCLV1-Nluc-R (Sall)</i>         | 5'-acatcgatgggtagtcgacAGAAATAACTGGAGCGATGTAGCC-3'       |
| <i>CsExo70B-HA-1300-F (KpnI)</i>    | 5'-ggacgagctcggtaccATGGTTGACAATGGCGAAGAAA-3'            |
| <i>CsExo70B-HA-1300-R (PstI)</i>    | 5'-aacgaaagctcgagTCAAGCGTAATCTGGAACGTCA-3'              |
| <i>CsERECTA-1300-FLAG-F (KpnI)</i>  | 5'-ggacgagctcggtaccATGAAGTCTGTGAAGAGGGCAG-3'            |
| <i>CsERECTA-1300-FLAG-R (BstBI)</i> | 5'-ggtcttttagtctcgaaCTCACTGTTTTGTGATATTACC-3'           |
| <i>CsFLS2-1300-FLAG-F (KpnI)</i>    | 5'-ggacgagctcggtaccATGGCTTCTTACGTTAGTTTAGC-3'           |
| <i>CsFLS2-1300-FLAG-R (BstBI)</i>   | 5'-ggtcttttagtctcgaaCAATTCATCCCTCTGCAGCT-3'             |

---

|                                   |                                                               |
|-----------------------------------|---------------------------------------------------------------|
| <i>CsLYK5-1300-FLAG-F (KpnI)</i>  | 5'-ggacgagctc <b>ggta</b> ccATGAAAATAATTTCAACTTTTTATTCTCT-3'  |
| <i>CsLYK5-1300-FLAG-R (BstBI)</i> | 5'-ggtctttgtagct <b>tcgaa</b> TAATTCCACATTTGTCTCTGCC-3'       |
| <i>CsBAK1-1300-FLAG-F (KpnI)</i>  | 5'-acgggggacgagctc <b>ggta</b> ccATGTCGGTGATGTTTCAGTTCTTCG-3' |
| <i>CsBAK1-1300-FALG-R (BstBI)</i> | 5'-atggtctttgtagct <b>tcgaa</b> TCTTGGACCAGACAATTCATCAGG-3'   |

---

Note: The lower letters represent the vector sequence and the red represents the restriction site of the vector.

**Table S5. List of gene accession numbers used in this study**

| <b>Gene name</b>              | <b>Gene ID</b>          | <b>Species</b>         | <b>Family</b> |
|-------------------------------|-------------------------|------------------------|---------------|
| <i>CsExo70B</i>               | <i>CsaV3_1G036490.1</i> | <i>Cucumis sativus</i> | Cucurbitaceae |
| <i>CsExo70G2</i>              | <i>CsaV3_7G033810.1</i> | <i>Cucumis sativus</i> | Cucurbitaceae |
| <i>CsERECTA</i>               | <i>CsaV3_4G036080.1</i> | <i>Cucumis sativus</i> | Cucurbitaceae |
| <i>CsFLS2</i>                 | <i>CsaV3_6G051540.1</i> | <i>Cucumis sativus</i> | Cucurbitaceae |
| <i>CsLYK5</i>                 | <i>CsaV3_2G028380.1</i> | <i>Cucumis sativus</i> | Cucurbitaceae |
| <i>CsFERONIA</i>              | <i>CsaV3_4G027260.1</i> | <i>Cucumis sativus</i> | Cucurbitaceae |
| <i>CsCLAVATA1</i>             | <i>CsaV3_3G045960</i>   | <i>Cucumis sativus</i> | Cucurbitaceae |
| <i>CsBAK1</i>                 | <i>CsaV3_4G009310</i>   | <i>Cucumis sativus</i> | Cucurbitaceae |
| <i>CsPR1</i>                  | <i>CsaV3_7G007620.1</i> | <i>Cucumis sativus</i> | Cucurbitaceae |
| <i>CsPR2</i>                  | <i>CsaV3_1G044780.1</i> | <i>Cucumis sativus</i> | Cucurbitaceae |
| <i>CsH<sup>+</sup>-ATPase</i> | <i>CsaV3_2G031420</i>   | <i>Cucumis sativus</i> | Cucurbitaceae |
